# Supplementary material
Source: Springer Nature journal article supplement (https://www.springermedizin.de/resource/supplementary/12913_2013_2850_MOESM1_ESM.pdf/9531674)
Supplement: MOESM1 [file 9531674]

**Intake appointment with the patient:**

involves 1 health professional plus 2 students from any discipline

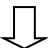

**Case conference:**

each case is discussed by an interprofessional team and the most appropriate services are decided upon

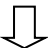

**Services from one or more profession are offered to the patient**

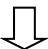

**Patients accepts or declines offered services**

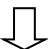

**Patient commences intervention for approximately 3–6 months**

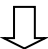

**Re-referral to the service**

if intervention needs to continue for longer than 12 months
